# Supplementary material for: Pharmacokinetics, Pharmacodynamics and Drug–Drug Interactions of New Anti-Migraine Drugs—Lasmiditan, Gepants, and Calcitonin-Gene-Related Peptide (CGRP) Receptor Monoclonal Antibodies
Source: PubMed Central journal article supplement (PMC7761673; doi:10.3390/pharmaceutics12121180), 2020-12-03
Supplement: pharmaceutics-12-01180-s001.pdf [file pharmaceutics-12-01180-s001.pdf]

Supplementary

# Pharmacokinetics, Pharmacodynamics and Drug-Drug Interactions of New Anti-Migraine Drugs—Lasmiditan, Gepants, and Calcitonin-Gene-Related Peptide (CGRP) Receptor Monoclonal Antibodies

Danuta Szkutnik-Fiedler

**Table S1.** Possible drug-drug interactions of lasmiditan [14,28,31,35–38,40,42,45–47].

| The risk or severity of serotonin syndrome can be potentially increased when lasmiditan is combined with the following drugs <sup>1,*</sup> | Serum concentration of the following drugs (P-gp and/or BCRP substrates) may potentially increase when combined with lasmiditan <sup>2,*</sup> | Serum concentration of lasmiditan (P-gp substrate) may potentially increase when it is combined with the following drugs <sup>3,*</sup> | Lasmiditan may increase the bradycardic effects of the following drugs <sup>*</sup> |
|---------------------------------------------------------------------------------------------------------------------------------------------|------------------------------------------------------------------------------------------------------------------------------------------------|-----------------------------------------------------------------------------------------------------------------------------------------|-------------------------------------------------------------------------------------|
| 5-hydroxytryptophan*                                                                                                                        | afatinib                                                                                                                                       |                                                                                                                                         | acebutolol                                                                          |
| alfentanil*                                                                                                                                 | alpelisib                                                                                                                                      |                                                                                                                                         | amlodipine                                                                          |
| almotriptan*                                                                                                                                | ambrisentan                                                                                                                                    |                                                                                                                                         | atenolol                                                                            |
| amitriptyline*                                                                                                                              | apixaban                                                                                                                                       |                                                                                                                                         | betaxolol                                                                           |
| amoxapine*                                                                                                                                  | belinostat                                                                                                                                     |                                                                                                                                         | carteolol                                                                           |
| bupirone*                                                                                                                                   | bisoprolol                                                                                                                                     |                                                                                                                                         | carvedilol                                                                          |
| citalopram*                                                                                                                                 | brentuximab vedotin                                                                                                                            |                                                                                                                                         | diltiazem                                                                           |
| clomipramine*                                                                                                                               | cabazitaxel                                                                                                                                    |                                                                                                                                         | esmolol                                                                             |
| cyclobenzaprine*                                                                                                                            | ceritinib                                                                                                                                      |                                                                                                                                         | felodipine                                                                          |
| desipramine*                                                                                                                                | cladribine                                                                                                                                     |                                                                                                                                         | isradipine                                                                          |
| desvenlaxaxine*                                                                                                                             | cobimetinib                                                                                                                                    | clobazam                                                                                                                                | ivabradine                                                                          |
| dexfenfluramine*                                                                                                                            | colchicine*                                                                                                                                    | daclatasvir                                                                                                                             | labetalol                                                                           |
| dextromethorphan*                                                                                                                           | cyclosporine                                                                                                                                   | erythromycin                                                                                                                            | levobetaxolol                                                                       |
| dihydroergotamine*                                                                                                                          | daunorubicin                                                                                                                                   | fexofenadine                                                                                                                            | levobunolol                                                                         |
| dolasetron*                                                                                                                                 | delafloxacin                                                                                                                                   | lapatinib                                                                                                                               | methyldopa                                                                          |
| doxepin*                                                                                                                                    | digitoxin                                                                                                                                      | ritonavir                                                                                                                               | metipranolol                                                                        |
| doxepin topical*                                                                                                                            | digoxin                                                                                                                                        |                                                                                                                                         | metoprolol                                                                          |
| duloxetine*                                                                                                                                 | donepezil                                                                                                                                      |                                                                                                                                         | nadolol                                                                             |
| eletriptan*                                                                                                                                 | doxorubicin                                                                                                                                    |                                                                                                                                         | nebivolol                                                                           |
| ergotamine*                                                                                                                                 | edoxaban*                                                                                                                                      |                                                                                                                                         | nicardipine                                                                         |
| escitalopram*                                                                                                                               | etoposide                                                                                                                                      |                                                                                                                                         | nifedipine                                                                          |
| fenfluramine*                                                                                                                               | everolimus                                                                                                                                     |                                                                                                                                         | nimodipine                                                                          |
| fentanyl*                                                                                                                                   | idelalisib                                                                                                                                     |                                                                                                                                         | nisoldipine                                                                         |
| fluoxetine*                                                                                                                                 | imatinib                                                                                                                                       |                                                                                                                                         | propranolol                                                                         |
| fluvoxamine*                                                                                                                                | indacaterol                                                                                                                                    |                                                                                                                                         | rivastigmine                                                                        |
| frovatriptan <sup>#</sup>                                                                                                                   | irinotecan                                                                                                                                     |                                                                                                                                         | siponimod                                                                           |
| furazolidone*                                                                                                                               | lemborexant                                                                                                                                    |                                                                                                                                         | timolol                                                                             |

---

|                  |                       |
|------------------|-----------------------|
| granisetron*     | linagliptin           |
| imipramine*      | lusutrombopag         |
| isocarboxazid*   | methotrexate          |
| levomilnacipran* | mibefradil            |
| linezolid*       | mirabegron            |
| lorcaserin*      | mitoxantrone          |
| maprotiline*     | nilotinib             |
| meperidine*      | nintedanib            |
| methylene blue*  | osimertinib           |
| milnacipran*     | ozanimod*             |
| mirtazapine*     | posaconazole          |
| naratriptan*#    | prucalopride          |
| nefazodone*      | quinidine             |
| nortriptyline*   | ranolazine            |
| ondansetron*     | rifaximin             |
| palonosetron*    | rimegepant            |
| paroxetine*      | riociguat             |
| pentazocine*     | rosuvastatin          |
| phenelzine*      | saquinavir            |
| procarbazine*    | selexipag             |
| protriptyline*   | sofosbuvir            |
| rasagiline*      | sulfasalazine         |
| remifentanil*    | tenofovir             |
| rizatriptan*#    | tenofovir alafenamide |
| safinamide*      | tenofovir disoproxil  |
| selegiline*      | teriflunomide         |
| sertraline*      | topotecan             |
| sibutramine*     | vemurafenib           |
| St. John's wort* | vinblastine           |
| sufentanil*      | vincristine           |
| tapentadol*      |                       |
| tranylcypromine* |                       |
| trazodone*       |                       |
| trimipramine*    |                       |
| tryptophan*      |                       |
| venlafaxine*     |                       |
| vilazodone*      |                       |
| vortioxetine*    |                       |
| zolmitriptan*#   |                       |

---

\* Major interaction according to the [www.drugs.com](http://www.drugs.com) [46]; \* Information about the interaction can be found on both [www.drugs.com](http://www.drugs.com) [46] and [www.drugbank.com](http://www.drugbank.com) [45]; <sup>1</sup> Lasmiditan is a direct serotonin receptor agonist. When administered concomitantly with other drugs that also increase 5-HT levels the risk of serotonin syndrome increases [14,28,31,35–38]. No clinical DDI studies were conducted to evaluate the clinical significance of these drug-drug interactions, except sumatriptan; # Coadministration of lasmiditan and sumatriptan did not cause serotonin syndrome or any clinically relevant interaction between these two drugs [40]; <sup>2</sup> Lasmiditan exhibited *in vitro* inhibition of intestinal P-gp and BCRP with drug-drug interaction indices  $I_{gut}/IC_{50}$  exceeded the FDA [47] cutoff value of 10, indicating that lasmiditan has the potential to inhibit P-gp or BCRP *in vivo* [42]. No clinical DDI studies were conducted; <sup>3</sup> Lasmiditan is a substrate for P-gp *in vitro*; therefore, combined administration of lasmiditan with P-gp inhibitors may result in a potential increase of its blood

concentration [14,21,28,35,42]. Lasmiditan, however, is a BCS Class I drug and is unlikely to be affected by P-gp inhibitors [42]. No clinical DDI studies were conducted.

**Table S2.** Possible drug-drug interactions of ubrogepant [45,46,53–55,57–59,63,65–67].

| Serum concentration of ubrogepant may potentially increase when it is combined with the following drugs (BCRP and/or P-gp inhibitors) <sup>1,*</sup> | Serum concentration of ubrogepant may potentially increase when it is combined with the following drugs (CYP3A4 inhibitors) <sup>2,*</sup> | Serum concentration of ubrogepant may potentially decrease when it is combined with the following drugs (CYP3A4 inducers) <sup>2,*</sup> |
|------------------------------------------------------------------------------------------------------------------------------------------------------|--------------------------------------------------------------------------------------------------------------------------------------------|------------------------------------------------------------------------------------------------------------------------------------------|
| afatinib                                                                                                                                             | abametapir topical                                                                                                                         | aminogluthethimide                                                                                                                       |
| bepidil                                                                                                                                              | abiraterone                                                                                                                                | amobarbital                                                                                                                              |
| capmatinib                                                                                                                                           | amiodarone                                                                                                                                 | apalutamide*                                                                                                                             |
| carvedilol                                                                                                                                           | amlodipine                                                                                                                                 | armodafinil                                                                                                                              |
| curcumin                                                                                                                                             | amprenavir                                                                                                                                 | bexarotene                                                                                                                               |
| cyclosporine                                                                                                                                         | aprepitant                                                                                                                                 | bosentan                                                                                                                                 |
| daclatasvir                                                                                                                                          | atazanavir*                                                                                                                                | brigatinib                                                                                                                               |
| eliglustat                                                                                                                                           | bicalutamide                                                                                                                               | butabarbital                                                                                                                             |
| eltrombopaq                                                                                                                                          | boceprevir*                                                                                                                                | butalbital                                                                                                                               |
| eluxadoline                                                                                                                                          | ceritinib*                                                                                                                                 | carbamazepine*                                                                                                                           |
| encorafenib                                                                                                                                          | chloramphenicol                                                                                                                            | cenobamate                                                                                                                               |
| flibanserin                                                                                                                                          | cimetidine                                                                                                                                 | dabrafenib                                                                                                                               |
| fostamatinib                                                                                                                                         | ciprofloxacin                                                                                                                              | dexamethasone                                                                                                                            |
| fostemsavir                                                                                                                                          | clarithromycin*                                                                                                                            | doravirine                                                                                                                               |
| gefitinib                                                                                                                                            | clotrimazole                                                                                                                               | efavirenz                                                                                                                                |
| ibrutinib                                                                                                                                            | cobicistat*                                                                                                                                | elagolix                                                                                                                                 |
| lapatinib                                                                                                                                            | conovaptan                                                                                                                                 | enzalutamide*                                                                                                                            |
| lasmiditan                                                                                                                                           | crizotinib                                                                                                                                 | eslicarbazepine                                                                                                                          |
| midostaurin                                                                                                                                          | danazol                                                                                                                                    | etravirine                                                                                                                               |
| neratinib                                                                                                                                            | darunavir                                                                                                                                  | felbamate                                                                                                                                |
| niraparib                                                                                                                                            | delavirdine*                                                                                                                               | fosphenytoin*                                                                                                                            |
| olaparib                                                                                                                                             | diltiazem                                                                                                                                  | glycerol phenylbutyrate                                                                                                                  |
| osimertinib                                                                                                                                          | duvelisib                                                                                                                                  | griseofulvin                                                                                                                             |
| ponatinib                                                                                                                                            | erythromycin                                                                                                                               | ivosidenib                                                                                                                               |
| progesterone                                                                                                                                         | fedratinib                                                                                                                                 | lesinurad                                                                                                                                |
| propafenone                                                                                                                                          | fluconazole                                                                                                                                | lorlatinib                                                                                                                               |
| quinidine                                                                                                                                            | fluvoxamine                                                                                                                                | mephobarbital                                                                                                                            |
| quinine                                                                                                                                              | fosamprenavir                                                                                                                              | metreleptin                                                                                                                              |
| regorafenib                                                                                                                                          | fosaprepitant                                                                                                                              | mitotane*                                                                                                                                |
| rolapitant                                                                                                                                           | goldenseal                                                                                                                                 | modafinil                                                                                                                                |
| safinamide                                                                                                                                           | grepafloxacin                                                                                                                              | nafcillin                                                                                                                                |
| sarecycline                                                                                                                                          | idelalisib*                                                                                                                                | nevirapine                                                                                                                               |
| simeprevir                                                                                                                                           | imatinib                                                                                                                                   | oritavancin                                                                                                                              |
| sonidegib                                                                                                                                            | indinavir*                                                                                                                                 | oxcarbazepine                                                                                                                            |
| spironolactone                                                                                                                                       | isavuconazonium                                                                                                                            | pentobarbital                                                                                                                            |
| tacrolimus                                                                                                                                           | isoniazid                                                                                                                                  | pexidartinib                                                                                                                             |
| tamoxifen                                                                                                                                            | itraconazole*                                                                                                                              | phenobarbital*                                                                                                                           |

|               |                 |                  |
|---------------|-----------------|------------------|
| tedizolid     | ivacaftor       | phenytoin*       |
| teriflunomide | ketoconazole*   | pitolisant       |
| ticagrelor    | lefamulin       | primidone*       |
| tolvaptan     | lemborexant     | rifabutin*       |
| ulipristal    | letermovir      | rifampin*        |
| uridine       | levamlodipine   | rifapentine*     |
| valbenazine   | lomitapide      | rufinamide       |
| venetoclax    | mibefradil*     | secobarbital     |
|               | mifepristone*   | somapacitan-beco |
|               | nefazodone*     | somatrem         |
|               | nelfinavir*     | somatropin       |
|               | nifedipine      | St. John's wort* |
|               | nilotinib       | tazemetostat     |
|               | palbociclib     | telotristat      |
|               | pazopanib       | troglitazone     |
|               | posaconazole*   | vemurafenib      |
|               | ranolazine      |                  |
|               | ribociclib      |                  |
|               | ritonavir*      |                  |
|               | rucaparib       |                  |
|               | saquinavir*     |                  |
|               | selpercatinib   |                  |
|               | stiripentol     |                  |
|               | suvorexant      |                  |
|               | telaprevir*     |                  |
|               | telithromycin*  |                  |
|               | troleandomycin* |                  |
|               | tucatinib       |                  |
|               | verapamil       |                  |
|               | voriconazole*   |                  |
|               | voxelotor       |                  |
|               | zafirlukast     |                  |

\* Major interaction according to the [www.drugs.com](http://www.drugs.com) [46] (strong CYP3A4 inhibitors or strong CYP3A4 inducers); \* Major interaction according to the [www.drugs.com](http://www.drugs.com) [46] (strong CYP3A4 inhibitors or strong CYP3A4 inducers); \* Information about the interaction can be found on both [www.drugs.com](http://www.drugs.com) [46] and [www.drugbank.com](http://www.drugbank.com) [45]; <sup>1</sup>No clinical DDI studies with inhibitors of P-gp and BCRP transporters have been performed [53,63]; <sup>2</sup>DDI studies with CYP3A4 modulators were conducted for verapamil, ketoconazole, and rifampin [63].

#### Recommended dosage:

- i. BCRP and/or P-gp inhibitors: an initial ubrogepant dose is 50 mg, a second 50 mg dose may be administered at least 2 hours after the initial dose;
- ii. strong CYP3A4 inhibitors: combinations should be avoided;
- iii. moderate or weak CYP3A4 inhibitors: an initial ubrogepant dose is 50 mg, a second 50 mg dose should be avoided within 24 hours of the initial dose (moderate CYP3A4 inhibitors), a second 50 mg dose may be administered at least 2 hours after the initial dose (weak CYP3A4 inhibitors);
- iv. strong CYP3A4 inducers: combinations should be avoided;

- v. moderate or weak CYP3A4 inducers: an initial ubrogepant dose is 100, a second 100 mg dose may be administered at least 2 hours after the initial dose.

**Table S3.** Possible drug-drug interactions of rimegepant [45,46,69,71–73,76–78,80,82].

| Serum concentration of rimegepant may potentially increase when it is combined with the following drugs (BCRP and/or P-gp inhibitors) <sup>1,*</sup> | Serum concentration of rimegepant may potentially increase when it is combined with the following drugs (CYP3A4 inhibitors) <sup>2,*</sup> | Serum concentration of rimegepant may potentially decrease when it is combined with the following drugs (CYP3A4 inducers) <sup>2,*</sup> |
|------------------------------------------------------------------------------------------------------------------------------------------------------|--------------------------------------------------------------------------------------------------------------------------------------------|------------------------------------------------------------------------------------------------------------------------------------------|
|                                                                                                                                                      | abametapir topical                                                                                                                         |                                                                                                                                          |
|                                                                                                                                                      | abiraterone                                                                                                                                |                                                                                                                                          |
|                                                                                                                                                      | amprenavir                                                                                                                                 |                                                                                                                                          |
|                                                                                                                                                      | aprepitant                                                                                                                                 |                                                                                                                                          |
| afatinib                                                                                                                                             | atazanavir*                                                                                                                                | apalutamide*                                                                                                                             |
| amiodarone                                                                                                                                           | boceprevir*                                                                                                                                | bosentan*                                                                                                                                |
| capmatinib                                                                                                                                           | ceritinib*                                                                                                                                 | carbamazepine*                                                                                                                           |
| cobimetinib                                                                                                                                          | chloramphenicol                                                                                                                            | cenobamate*                                                                                                                              |
| cyclosporine                                                                                                                                         | ciprofloxacin                                                                                                                              | dabrafenib*                                                                                                                              |
| eltrombopag                                                                                                                                          | clarithromycin*                                                                                                                            | dexamethasone*                                                                                                                           |
| encorafenib                                                                                                                                          | cobicistat*                                                                                                                                | efavirenz*                                                                                                                               |
| fostemsavir                                                                                                                                          | conovaptan                                                                                                                                 | enzalutamide*                                                                                                                            |
| gefitinib                                                                                                                                            | crizotinib                                                                                                                                 | eslicarbazepine*                                                                                                                         |
| ibrutinib                                                                                                                                            | darunavir                                                                                                                                  | etravirine*                                                                                                                              |
| istradefylline                                                                                                                                       | delavirdine*                                                                                                                               | fosphenytoin*                                                                                                                            |
| lapatinib                                                                                                                                            | diltiazem                                                                                                                                  | lorlatinib*                                                                                                                              |
| lasmiditan                                                                                                                                           | dronedarone                                                                                                                                | mitotane*                                                                                                                                |
| midostaurin                                                                                                                                          | duvelisib                                                                                                                                  | modafinil*                                                                                                                               |
| neratinib                                                                                                                                            | erythromycin                                                                                                                               | nafcillin*                                                                                                                               |
| niraparib                                                                                                                                            | fedratinib                                                                                                                                 | nevirapine*                                                                                                                              |
| olaparib                                                                                                                                             | fluconazole                                                                                                                                | pexidartinib*                                                                                                                            |
| osimertinib                                                                                                                                          | fosamprenavir                                                                                                                              | phenobarbital*                                                                                                                           |
| ponatinib                                                                                                                                            | fosaprepitant                                                                                                                              | phenytoin*                                                                                                                               |
| propafenone                                                                                                                                          | idelalisib*                                                                                                                                | primidone*                                                                                                                               |
| regorafenib                                                                                                                                          | imatinib                                                                                                                                   | rifabutin*                                                                                                                               |
| rolapitant                                                                                                                                           | indinavir*                                                                                                                                 | rifampin*                                                                                                                                |
| saquinamide                                                                                                                                          | isavuconazonium                                                                                                                            | rifapentine*                                                                                                                             |
| sarecycline                                                                                                                                          | itraconazole*                                                                                                                              | somapacitan-beco                                                                                                                         |
| sonidegib                                                                                                                                            | ivacaftor                                                                                                                                  | somatrem                                                                                                                                 |
| sulfasalazine                                                                                                                                        | ketoconazole*                                                                                                                              | St. John's wort*                                                                                                                         |
| tacrolimus                                                                                                                                           | letermovir                                                                                                                                 | telotristat*                                                                                                                             |
| tafamidis                                                                                                                                            | mibefradil*                                                                                                                                | vemurafenib                                                                                                                              |
| tedizolid                                                                                                                                            | nefazodone*                                                                                                                                |                                                                                                                                          |
| teriflunomide                                                                                                                                        | nelfinavir*                                                                                                                                |                                                                                                                                          |
|                                                                                                                                                      | palbociclib                                                                                                                                |                                                                                                                                          |
|                                                                                                                                                      | posaconazole*                                                                                                                              |                                                                                                                                          |
|                                                                                                                                                      | ranolazine                                                                                                                                 |                                                                                                                                          |
|                                                                                                                                                      | ribociclib                                                                                                                                 |                                                                                                                                          |
|                                                                                                                                                      | ritonavir*                                                                                                                                 |                                                                                                                                          |

---

rucaparib  
saquinavir\*  
selpercatinib  
stiripentol  
telaprevir\*  
telithromycin\*  
troleandomycin\*  
tucatinib  
verapamil  
voriconazole\*  
voxelotor

---

\* Major interaction according to the [www.drugs.com](http://www.drugs.com) [46] (strong CYP3A4 inhibitors or strong CYP3A4 inducers); \* Information about the interaction can be found on both [www.drugs.com](http://www.drugs.com) [46] and [www.drugbank.com](http://www.drugbank.com) [45]; <sup>1</sup> No clinical DDI studies with inhibitors of P-gp and BCRP transporters have been performed [80]; <sup>2</sup>DDI studies with CYP3A4 modulators were conducted for itraconazole and rifampin [80].

#### Recommended dosage:

- i. BCRP and/or P-gp inhibitors: an initial rimegepant dose is 50 mg, a second 50 mg dose may be administered at least 2 hours after the initial dose;
- ii. strong CYP3A4 inhibitors: combinations should be avoided;
- iii. moderate CYP3A4 inhibitors: an initial rimegepant dose is 50 mg, a second 50 mg dose should be avoided within 24 hours of the initial dose;
- iv. weak CYP3A4 inhibitors: an initial rimegepant dose is 50 mg, a second 50 mg dose may be administered at least 2 hours after the initial dose;
- v. strong or moderate CYP3A4 inducers: combinations should be avoided;
- vi. weak CYP3A4 inducers: an initial rimegepant dose is 100, a second 100 mg dose may be administered at least 2 hours after the initial dose.
